# Supplementary material for: Elevation of MPF and MAPK gene expression, GSH content and mitochondrial distribution quality induced by melatonin promotes porcine oocyte maturation and development in vitro
Source: PeerJ. 2020 Oct 5;8:e9913. doi: 10.7717/peerj.9913 (PMC7543723; doi:10.7717/peerj.9913)
Supplement: Supplemental Information 1 — All the statistical analysis are based on the raw data recorded during exprimenting [file peerj-08-9913-s001.xlsx]

## Sheet: Sheet1
	assessment of oocyte maturation quality				GSH contents detection				Mitochondrial distribution					oocyte development				MPF and MAPK gene expression
MT concentration (mol/L)	oocyte number	number of survival oocytes	number of mature oocytes (first polar body expulsed)		oocyte number	GSH content per oocyte				oocyte number	number of oocytes with better distribution			oocyte number	number of cleavaged embryo	number of blastocyst					MPF	MAPK
0	200	184	158		100	8.47				100	32			80	54	31					1	1
10-12	200	183	163		100	9.41				100	56			80	56	31					1.05	1.66
10-9	200	188	174		100	9.44				100	64			80	62	39					1.76	2.88
10-6	200	187	167		100	9.08				100	40			80	63	38					1.28	1.93
second experiment
0	200	172	154		100	8.03				100	30			80	53	29					1	1
10-12	200	173	158		100	9.15				100	58			80	56	30					1.08	1.72
10-9	200	175	166		100	9.28				100	67			80	61	40					1.88	3.12
10-6	200	179	159		100	8.86				100	38			80	62	38					1.37	2.07
third experiment
0	200	182	156		100	8.26				100	29			80	55	32					1	1
10-12	200	180	162		100	9.18				100	56			80	54	30					1.16	1.58
10-9	200	185	173		100	9.3				100	64			80	63	38					1.72	3.06
10-6	200	184	162		100	9.03				100	45			80	65	37					1.32	1.84
																					rato value of each gene
All the statistical analysis are based on above raw data recorded during experimenting
